# Supplementary material for: Isoprenylated Flavonoids and 2-Arylbenzofurans from the Root Bark of Morus alba L. and Their Cytotoxic Activity of against HGC27 Cancer Cells
Source: Preprints.org preprint supplement (doi:10.20944/preprints202311.1185.v1), 2023-11-21
Supplement: Supplementary file 1 [file supplementary]

**Supplementary materials**

**Isoprenylated flavonoids and 2-arylbenzofurans from the root bark of *Morus alba*.L. and their cytotoxic activity of against HGC27 cancer cells**

Hang-Yi Pu a,b, Dong-Yi Cao c, Xue Zhou a,b, Fu Li a,b, Lun Wang a,b, Ming-Kui Wanga,b,*

a *Natural Products Research Center,**Chengdu Institute of Biology, Chinese Academy of Sciences, Chengdu 610041, China*

*b University of Chinese Academy of Sciences, Beijing 100049, China*

*c The Third Affiliated Hospital of Yunnan University of Chinese Medicine, Kunming 650500, Yunnan, China.*

* Corresponding Author at: *Key Laboratory of Mountain Ecological Restoration and Bioresource Utilization and Ecological Restoration Biodiversity Conservation Key Laboratory of Sichuan Province, Chengdu Institute of Biology, Chinese Academy of Sciences, Chengdu 610041,* People’s Republic of *China,* Tel/Fax: +86-28-82890821. E-mail address: [wangmk@cib.ac.cn](mailto:wangmk@cib.ac.cn) (Ming-Kui Wang).

**Supporting Information Available**

Figure S1. HR-ESI-MS spectrum of compound **1**.

Figure S2. 1H-NMR spectrum (400 MHz, CD3OD) of compound **1**.

Figure S3. 13C-NMR (100 MHz, CD3OD) spectrum of compound **1**.

Figure S4. DEPT 135 spectrum (100 MHz, CD3OD) of compound **1**.

Figure S5. HSQC spectrum of compound **1** in CD3OD.

Figure S6. HMBC spectrum of compound **1** in CD3OD.

Figure S7. 1H-1H COSY spectrum of compound **1** in CD3OD.

Figure S8. NOSEY spectrum of compound **1** in CD3OD.

Figure S9. HR-ESI-MS spectrum of compound **11**.

Figure S10. 1H-NMR spectrum (600 MHz, DMSO) of compound **11**.

Figure S11. 13C-NMR (150 MHz, DMSO) spectrum of compound **11**.

Figure S12. DEPT 135 spectrum (150 MHz, DMSO) of compound **11**.

Figure S13. HSQC spectrum of compound **11** in DMSO.

Figure S14. HMBC spectrum of compound **11** in DMSO.

Figure S15. 1H-1H COSY spectrum of compound **11** in DMSO.

Figure S16. HR-ESI-MS spectrum of compound **12**.

Figure S17. 1H-NMR spectrum (600 MHz, CD3OD) of compound **12**.

Figure S18. 13C-NMR spectrum (150 MHz, CD3OD) of compound **12**.

Figure S19. DEPT 135 spectrum (150 MHz, CD3OD) of compound **12**.

Figure S20. HSQC spectrum of compound **12** in CD3OD.

Figure S21. HMBC spectrum of compound **12** in CD3OD.

Figure S22. 1H-1H COSY spectrum of compound **12** in CD3OD.

Figure S23. 1H-NMR spectrum (600 MHz, DMSO) of compound **12**.

Figure S24. 13C-NMR (150 MHz, DMSO) spectrum of compound **12**.

Figure S25. DEPT 135 spectrum (150 MHz, DMSO) of compound **12**.


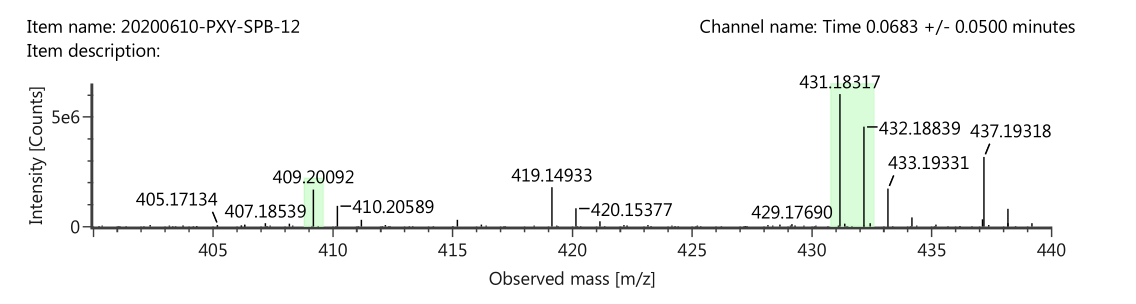
Figure S1**.** HR-ESI-MS spectrum of compound **1**.


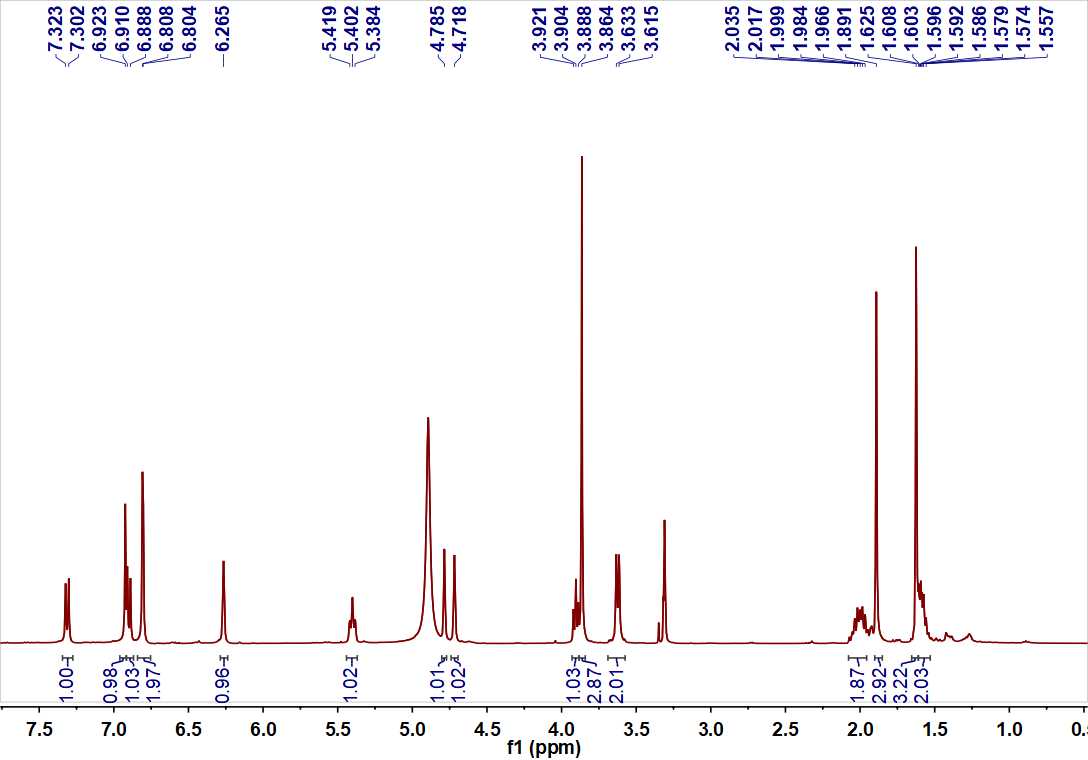


Figure S2. 1H-NMR spectrum (400 MHz, CD3OD) of compound **1**.


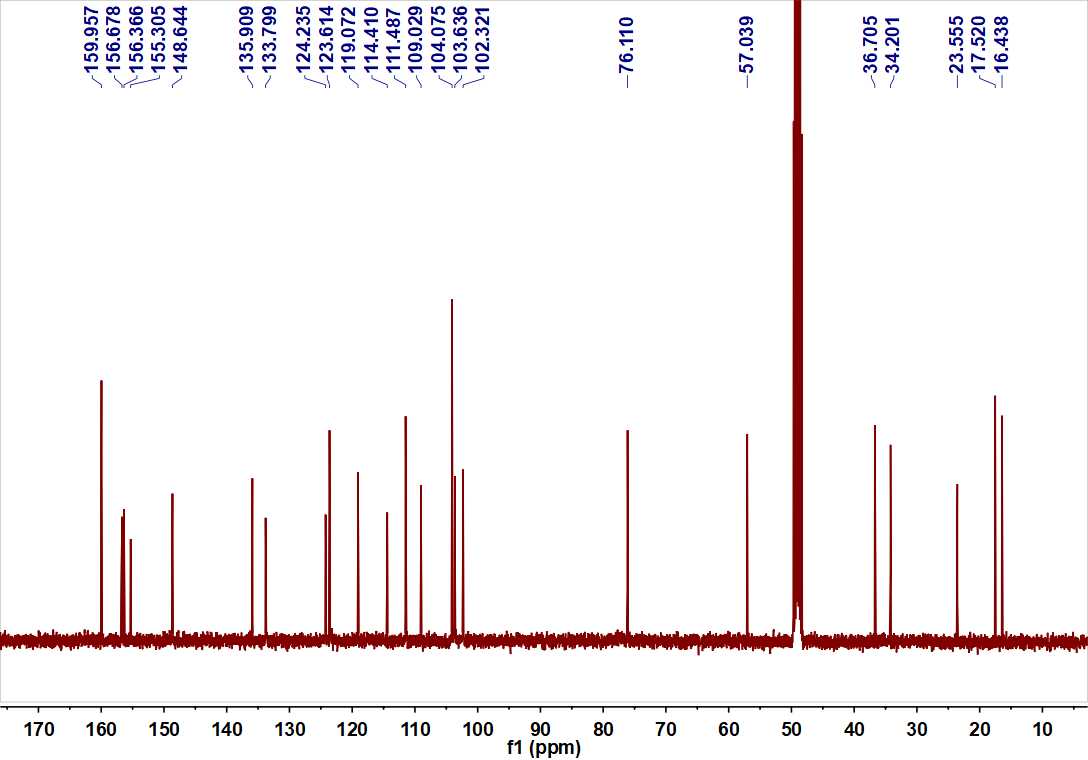


Figure S3. 13C-NMR (100 MHz, CD3OD) spectrum of compound **1**.


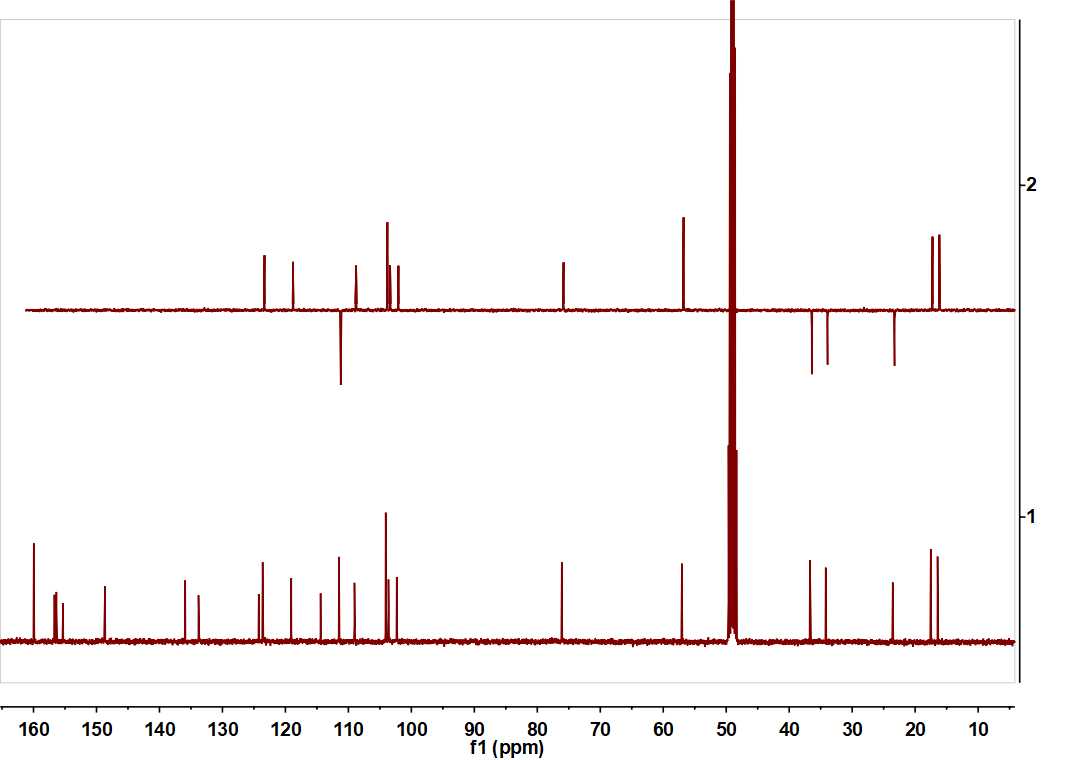


Figure S4. DEPT 135 spectrum (100 MHz, CD3OD) of compound **1**.


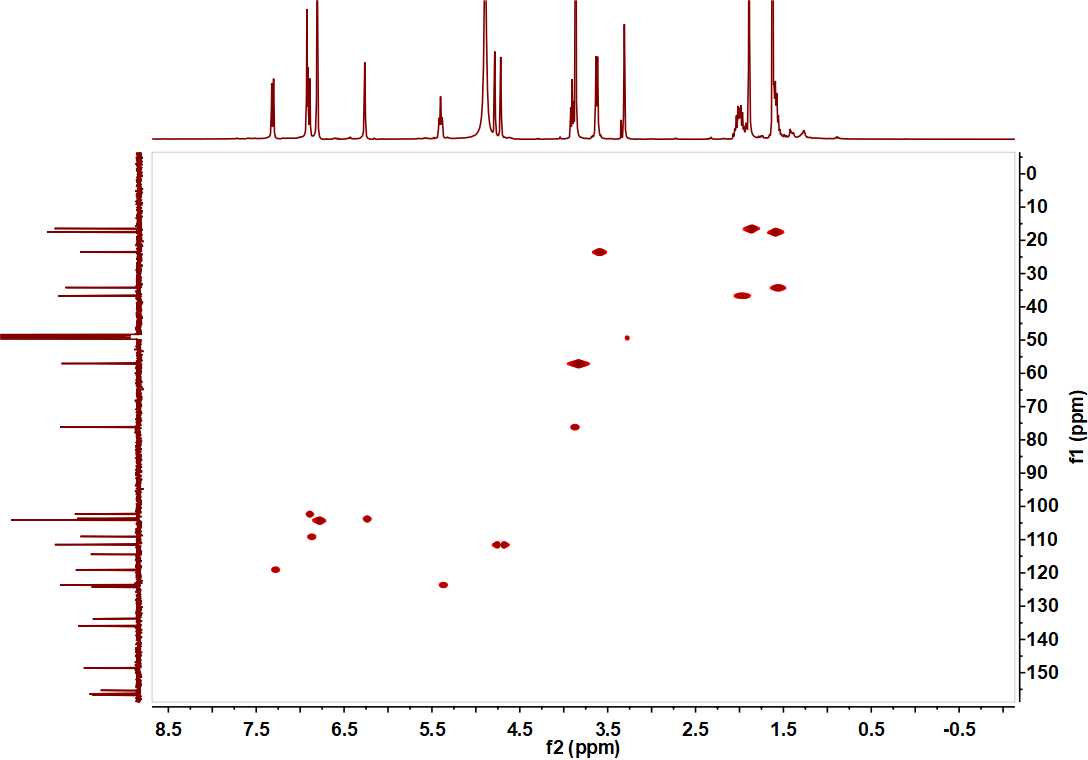


Figure S5. HSQC spectrum of compound **1** in CD3OD.


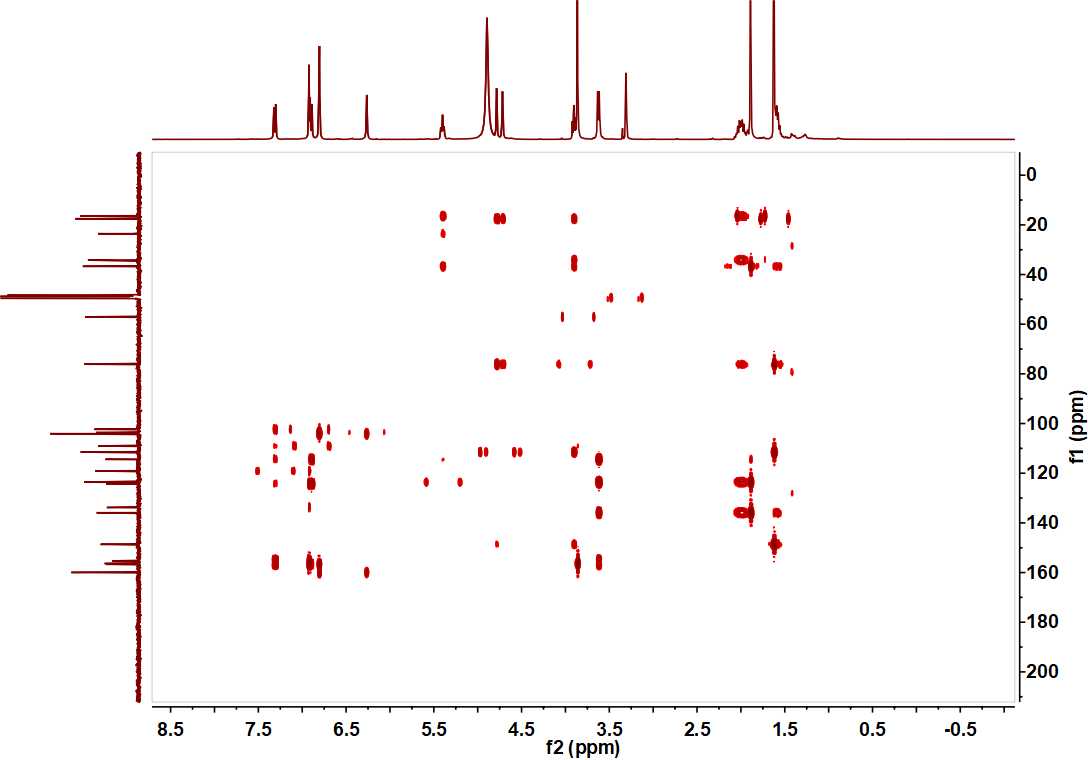


Figure S6. HMBC spectrum of compound **1** in CD3OD


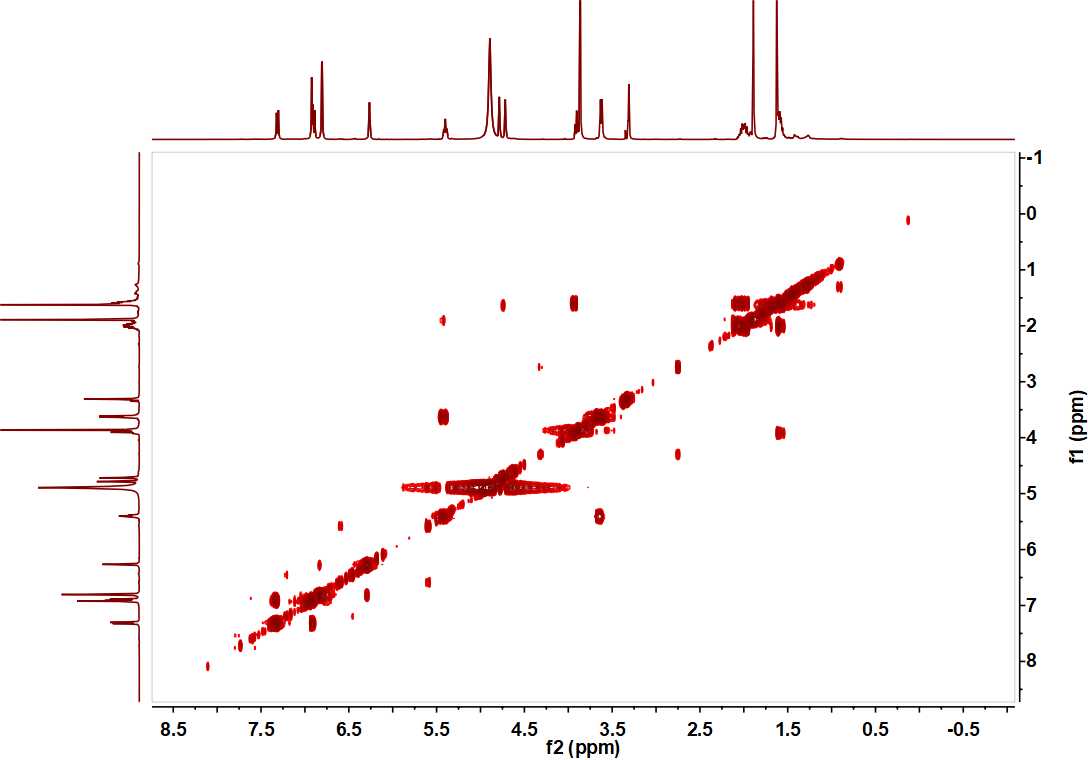


Figure S7. 1H-1H COSY spectrum of compound **1** in CD3OD.


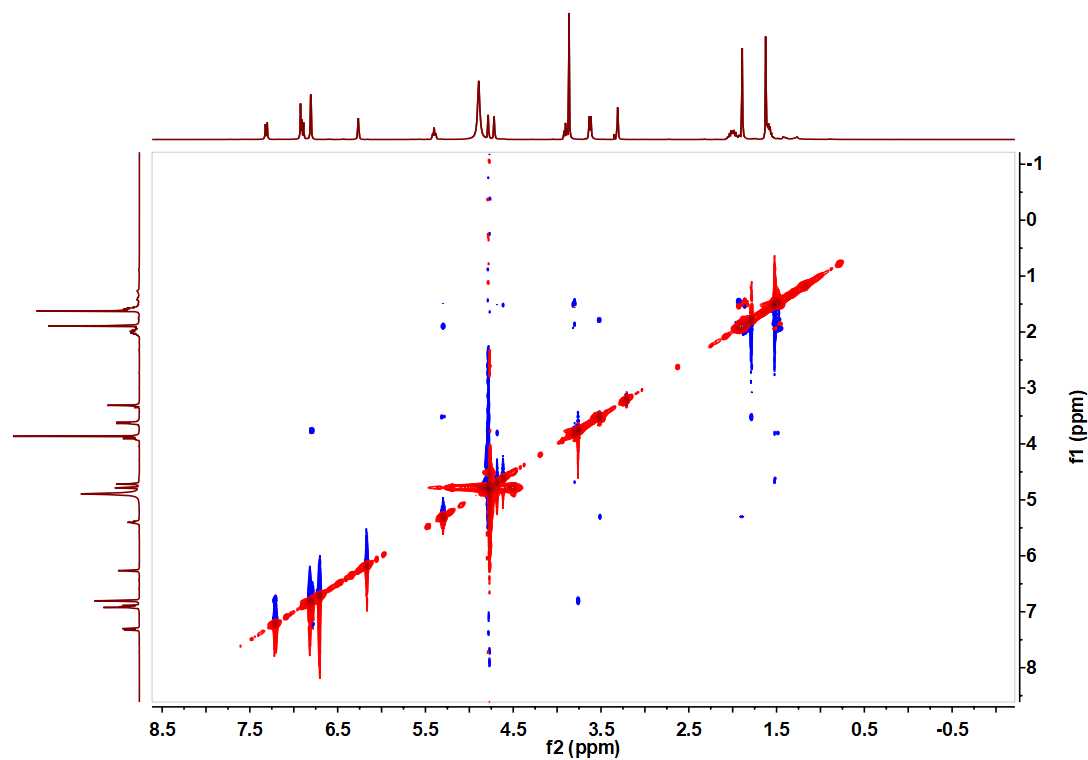


Figure S8. NOSEY spectrum of compound **1** in CD3OD.


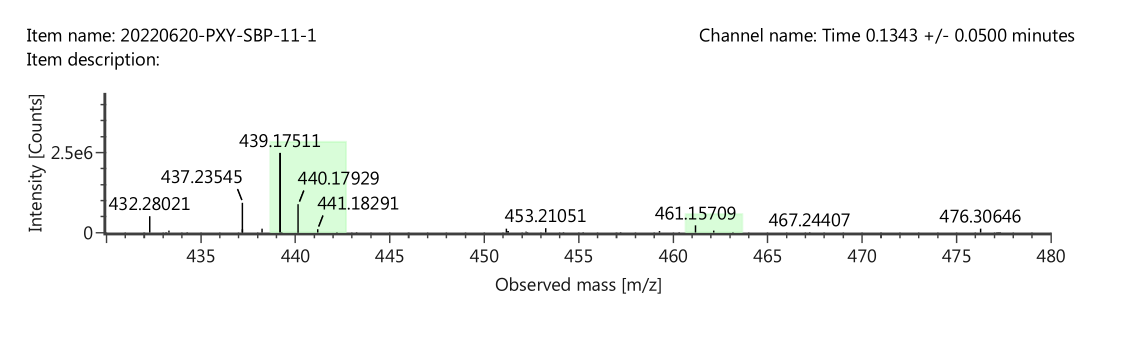


Figure S9. HR-ESI-MS spectrum of compound **11**.


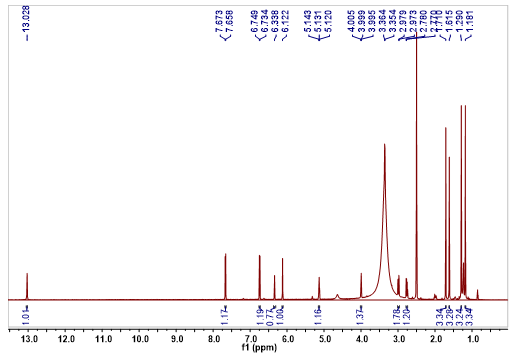


Figure S10. 1H-NMR spectrum (600 MHz, DMSO) of compound **11**.


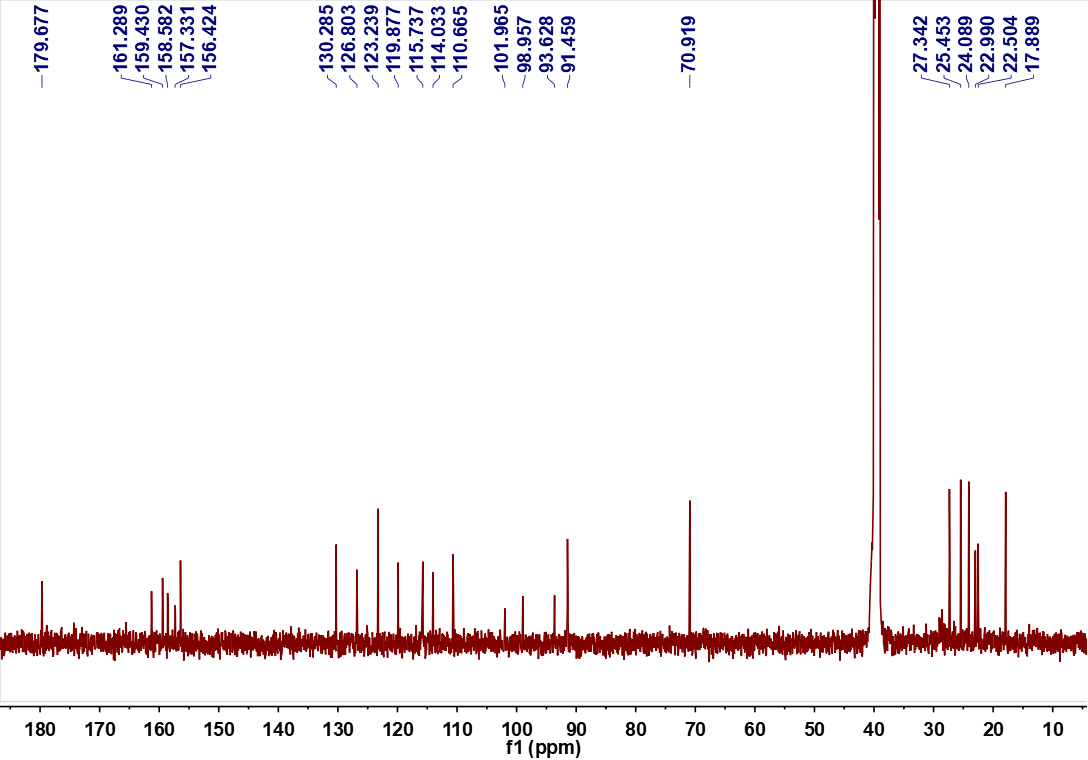


Figure S11. 13C-NMR (150 MHz, DMSO) spectrum of compound **11**.


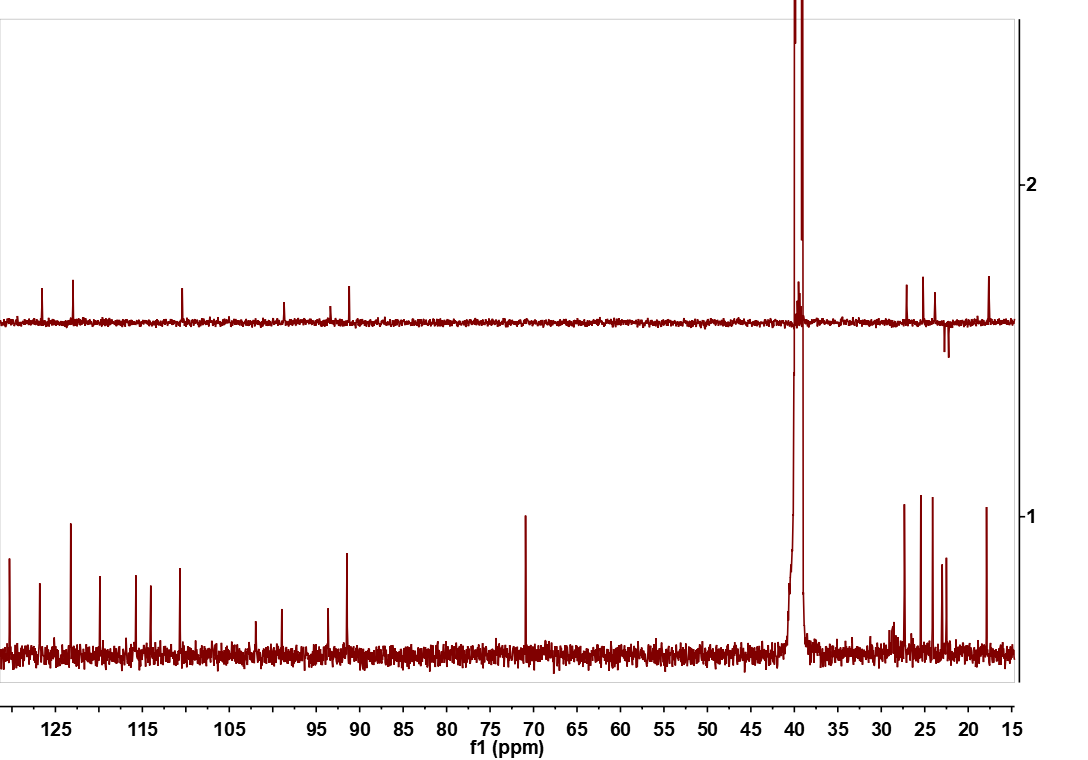


Figure S12. DEPT 135 spectrum (150 MHz, DMSO) of compound **11**.


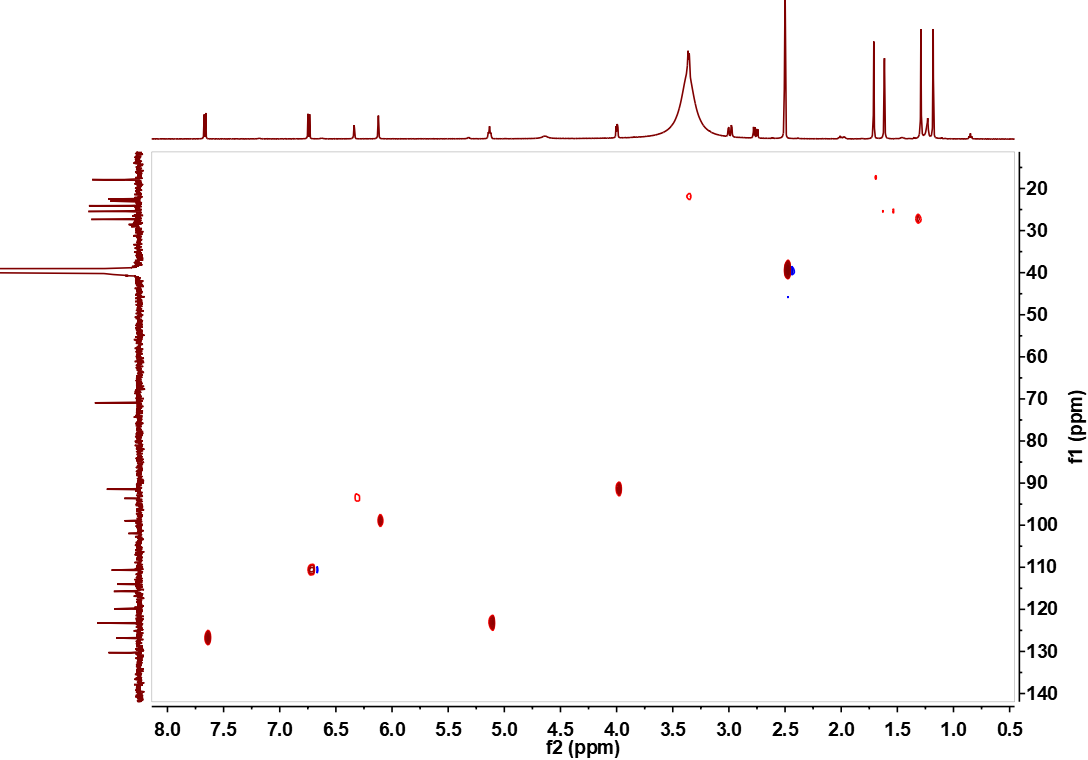


Figure S13. HSQC spectrum of compound **11** in DMSO.


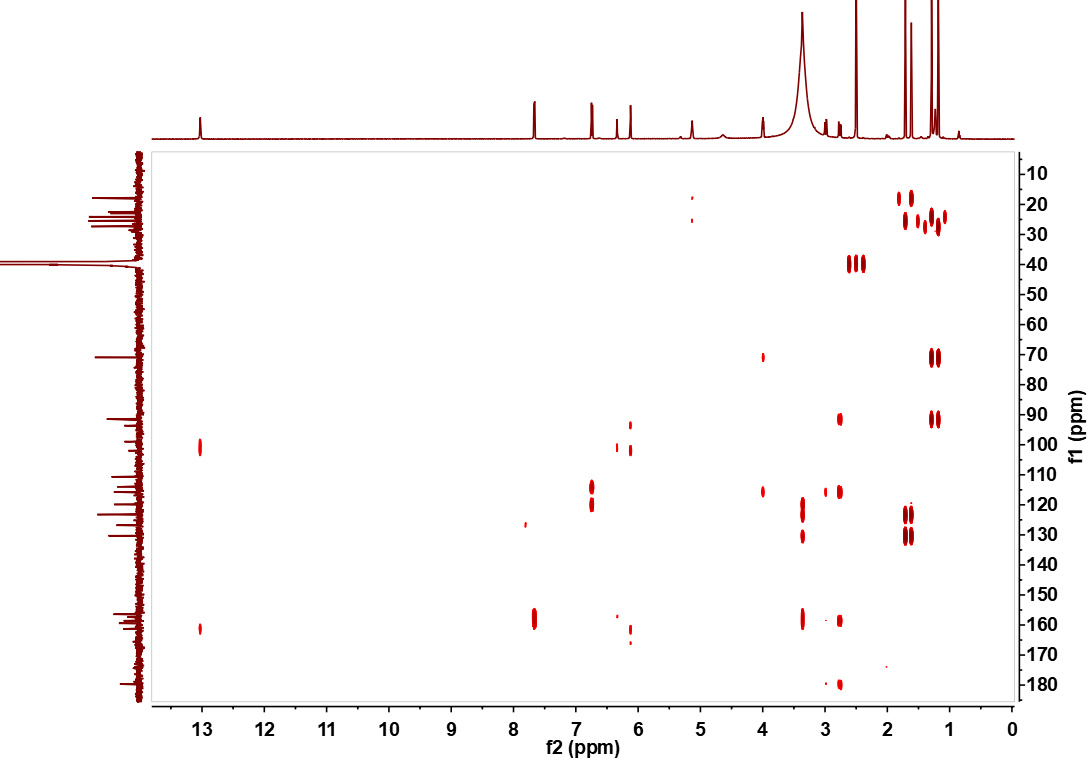


Figure S14. HMBC spectrum of compound **11** in DMSO.


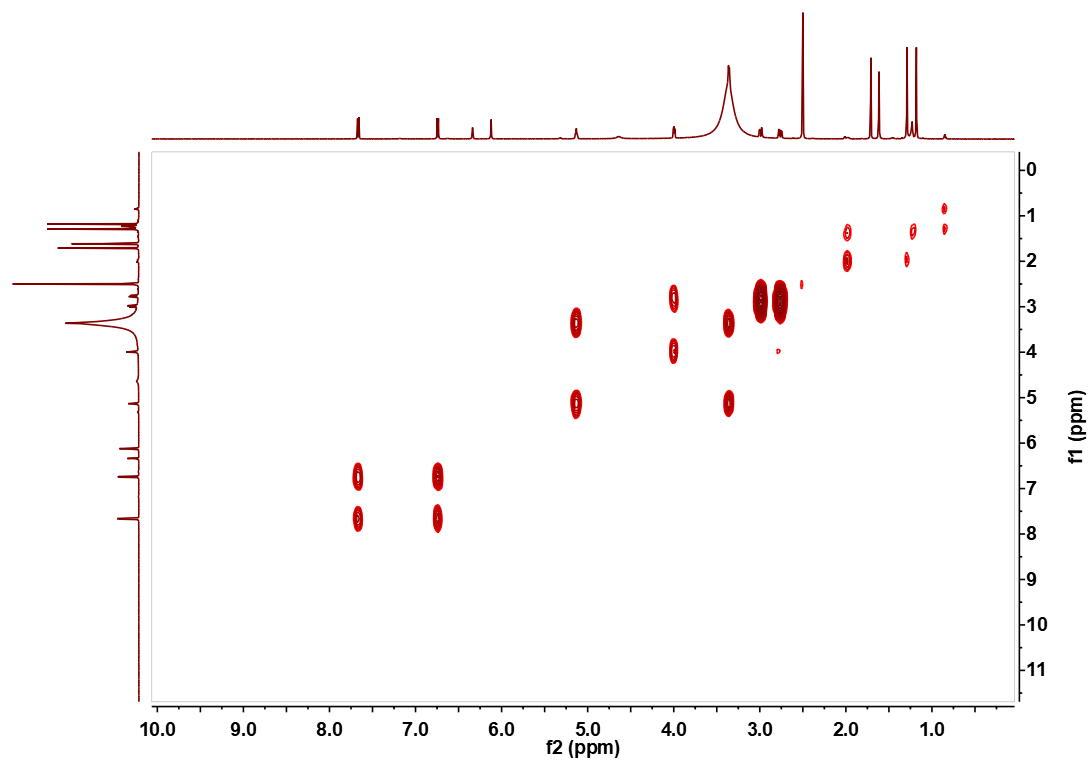


Figure S15. 1H-1H COSY spectrum of compound **11** in DMSO.


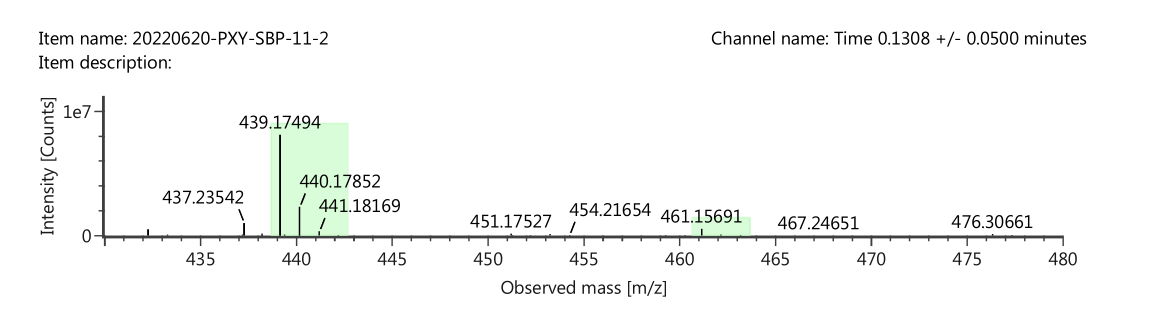


Figure S16. HR-ESI-MS spectrum of compound **12**.


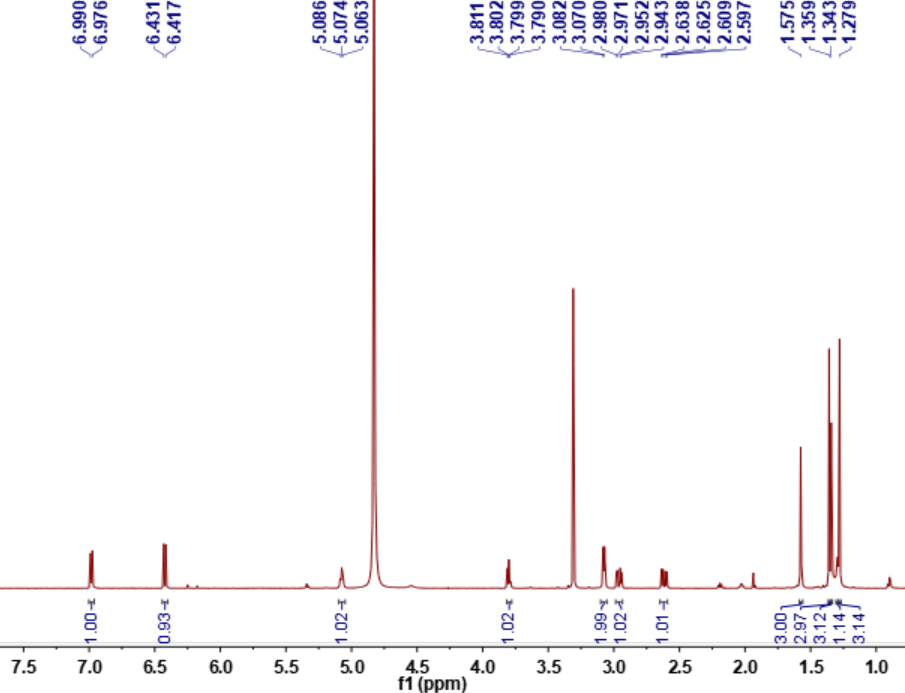


Figure S17. 1H-NMR spectrum (600 MHz, CD3OD) of compound **12**.


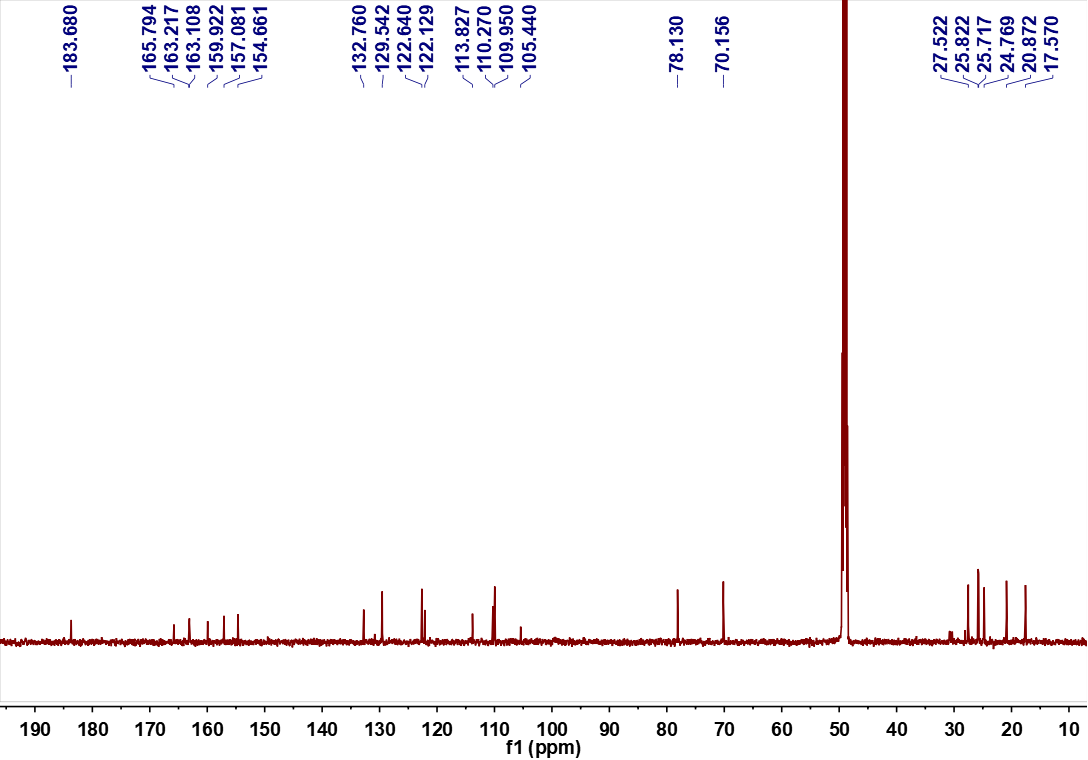


Figure S18. 13C-NMR spectrum (150 MHz, CD3OD) of compound **12**.

**
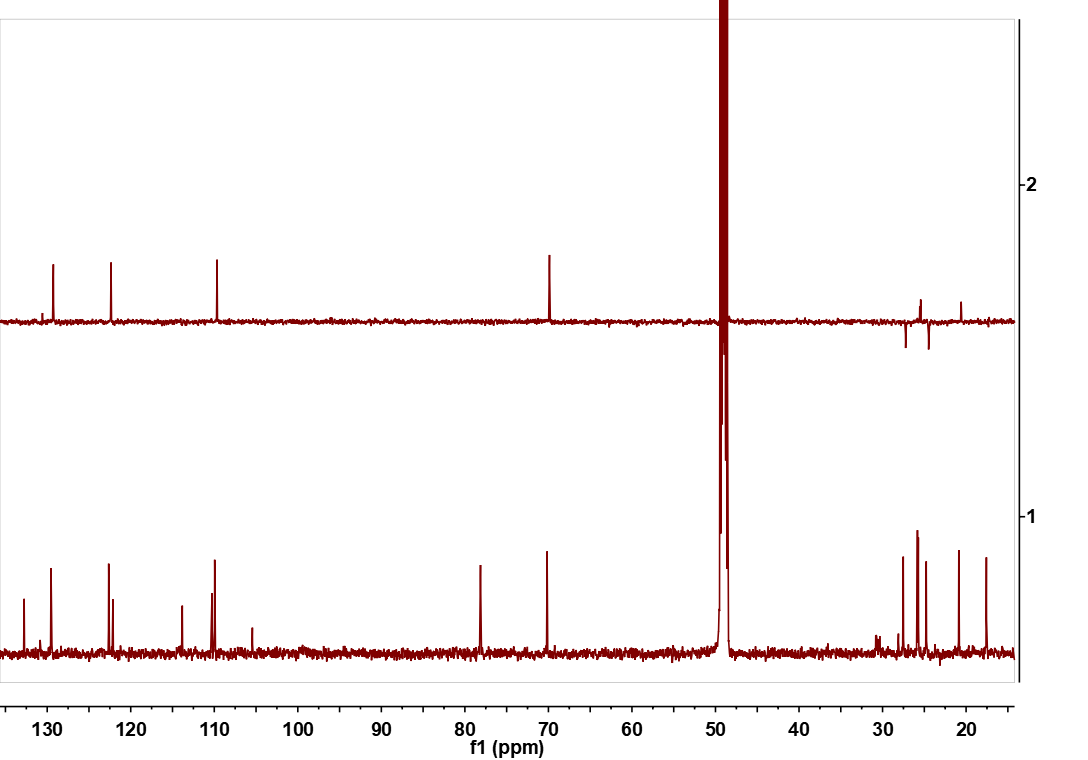
**

Figure S19. DEPT 135 spectrum (150 MHz, CD3OD) of compound **12**.


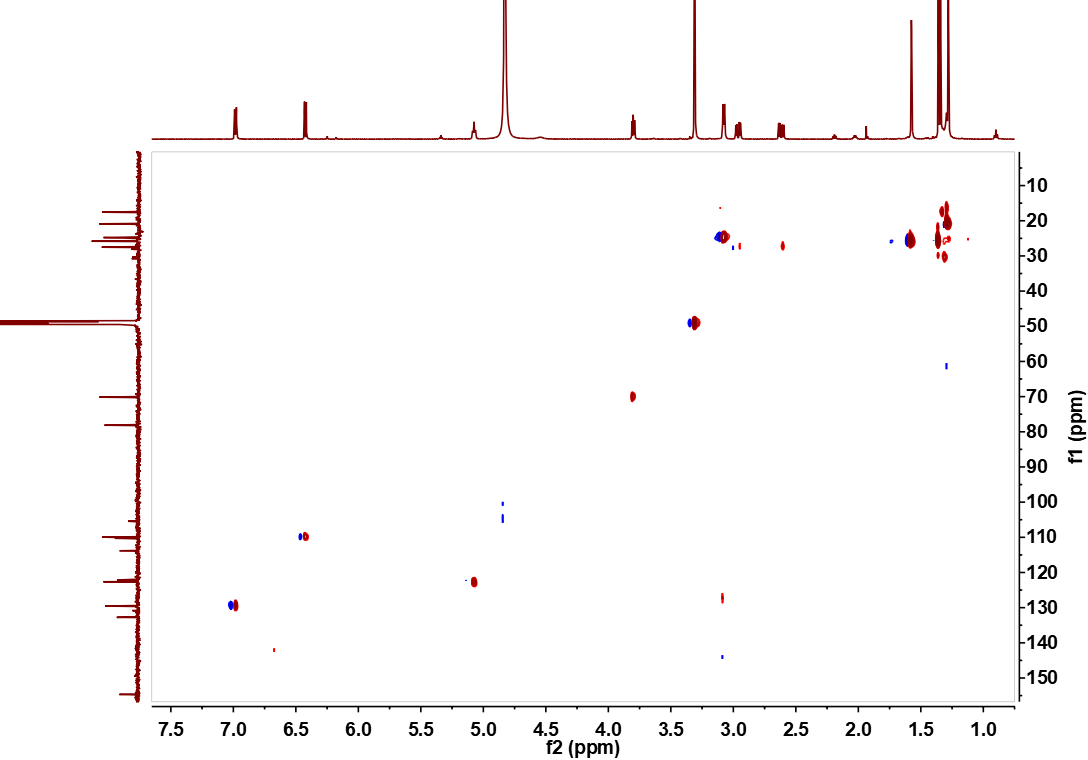


Figure S20. HSQC spectrum of compound **12** in CD3OD.


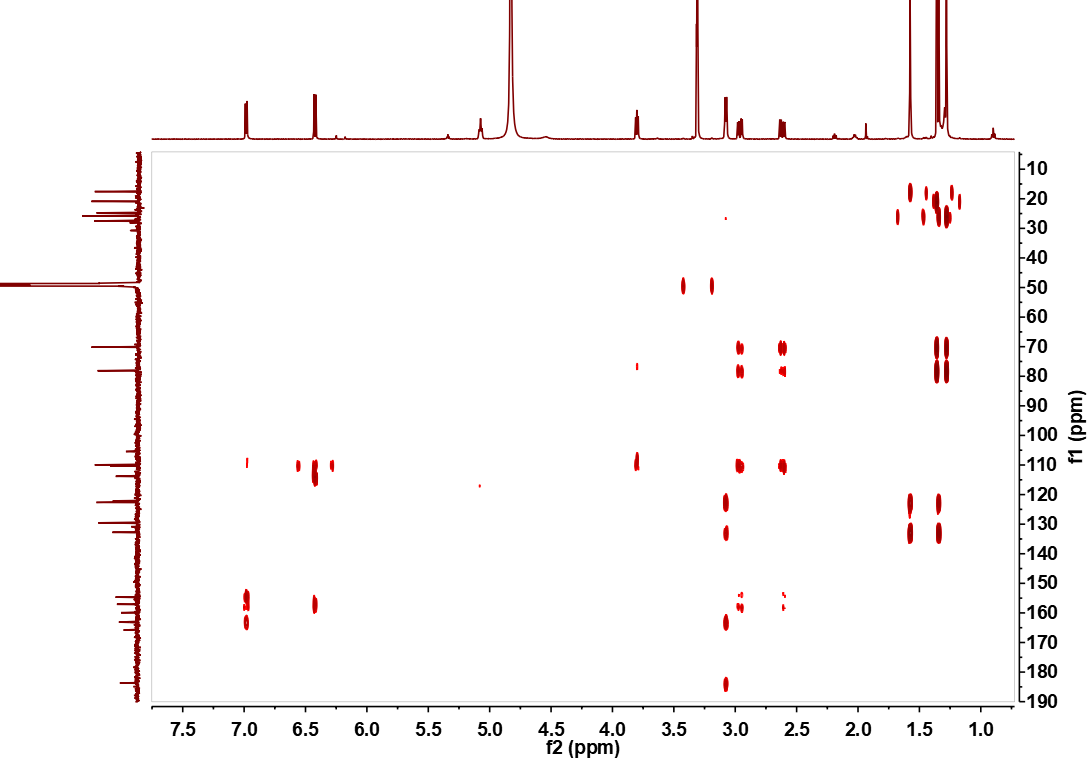


Figure S21. HMBC spectrum of compound **12** in CD3OD.

**
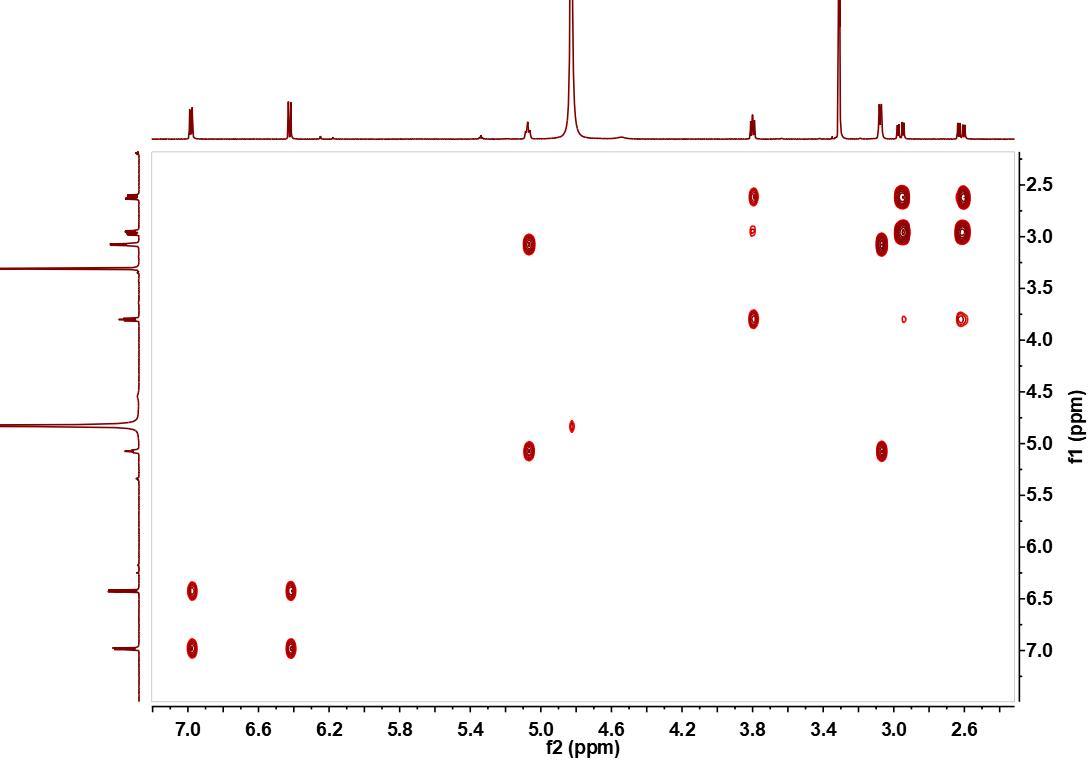
**

Figure S22. 1H-1H COSY spectrum of compound **12** in CD3OD.


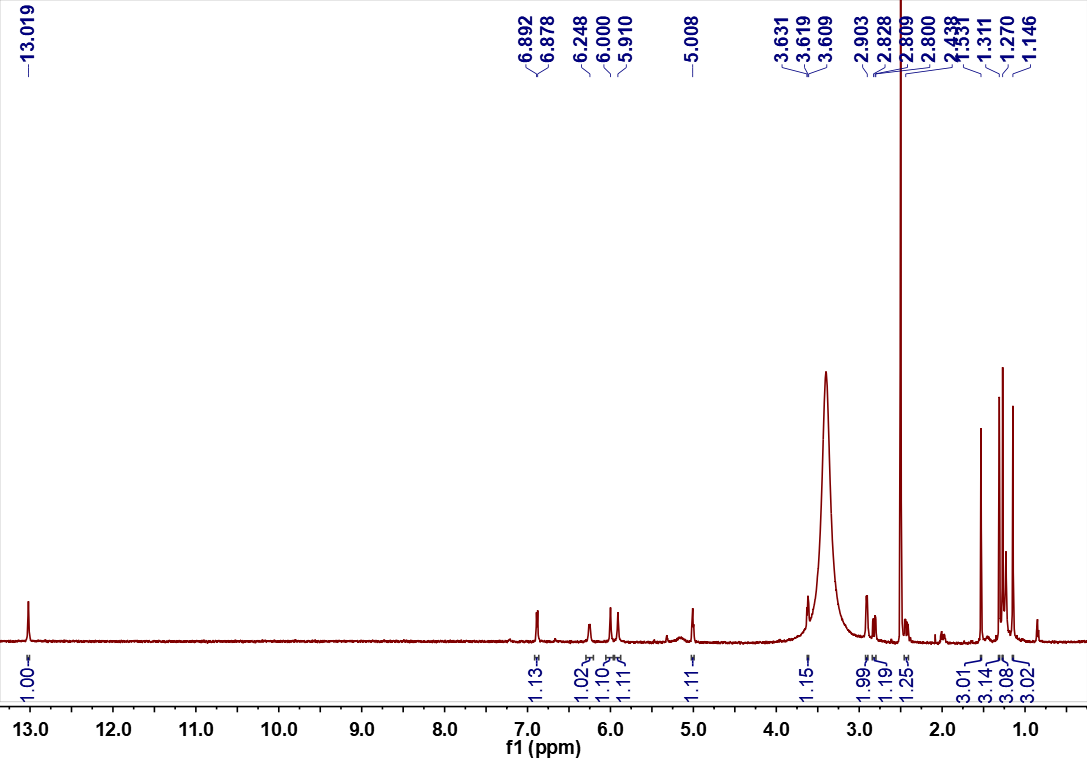


Figure S23. 1H-NMR spectrum (600 MHz, DMSO) of compound **12**.

.


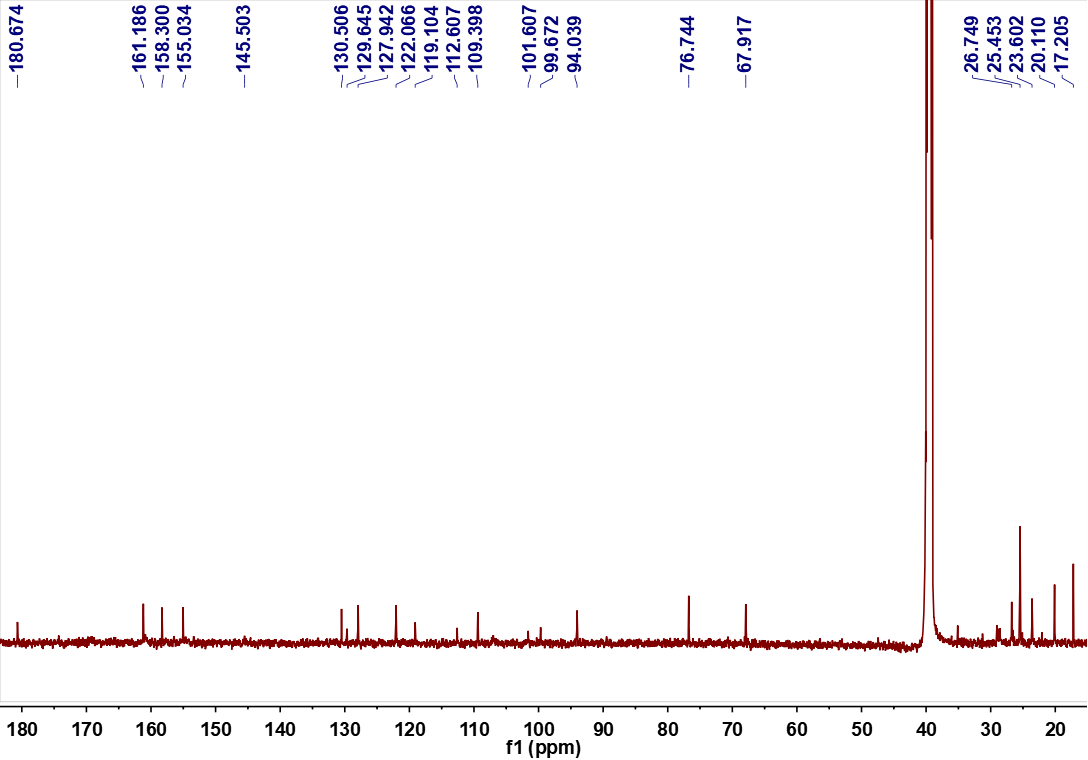


Figure S24. 13C-NMR (150 MHz, DMSO) spectrum of compound **12**.


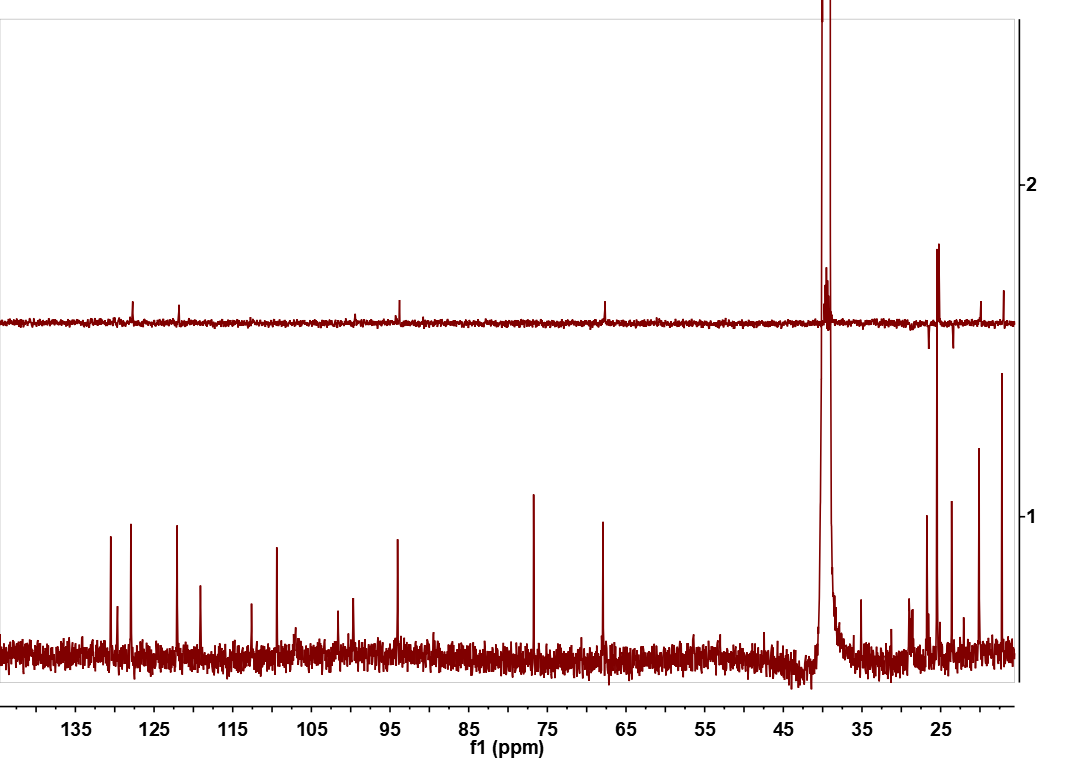


Figure S25. DEPT 135 spectrum (150 MHz, DMSO) of compound **12**.
